# Supplementary material for: New Non-Invasive Method for the Authentication of Apple Cultivars
Source: MDPI journal article supplement (doi:10.3390/foods11010089), 2021-12-29
Supplement: s1 [file s1]

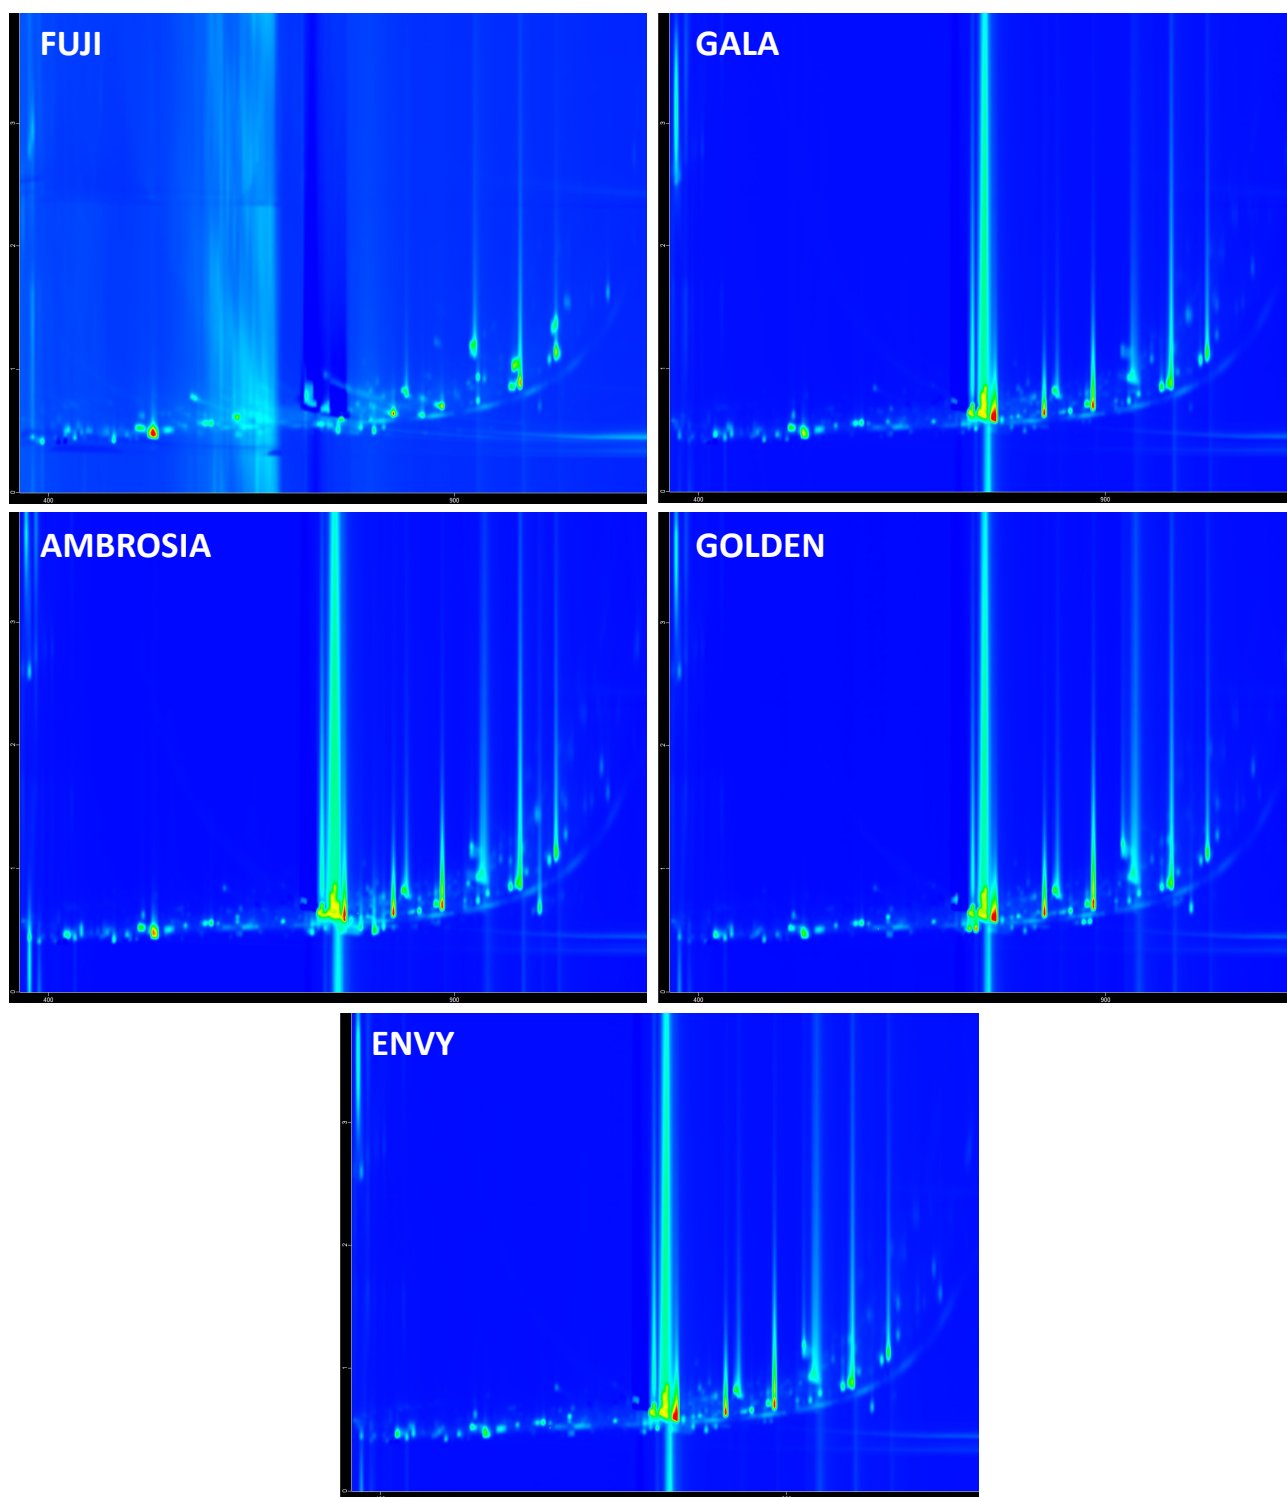

Figure S1. Representative two-dimensional chromatograms for Fuji, Gala, Ambrosia, Golden and Envy apples.

Table S1. Identified molecules on apple surface.

| Molecules                                                                                                          |
|--------------------------------------------------------------------------------------------------------------------|
| (2,5-Dimethoxyphenyl)acetone                                                                                       |
| (2-Aziridinylethyl)amine                                                                                           |
| (2E,6E)-3,7,11-Trimethyldodeca-2,6,10-trien-1-yl stearate                                                          |
| (3a?,4?,7?,7a?)-3a,4,7,7a-Tetrahydro-4,7-methano-1H-indene                                                         |
| (4,4-Dimethyl-5-methylene-4,5-dihydro-3H-pyrrol-2-yl)-(4,4-dimethyl-5-methylene-pyrrolidin-2-ylidene)-acetonitrile |
| 2,5-Dimethoxy-4-Iodoamphetamine, N-trimethylsilyl-                                                                 |
| 3,4,5-Trimethoxyamphetamine, N-(trimethylsilyl)-                                                                   |
| 4-Methylephedrine, N-trimethylsilyl-, trimethylsilyl ether                                                         |
| 4-Methyl-N-ethyl-norephedrine, N-trimethylsilyl-, trimethylsilyl ether                                             |
| MBDB, N-trimethylsilyl-                                                                                            |
| N-Ethylcathinone ephedrine, N-trimethylsilyl-, trimethylsilyl ether                                                |
| Phenylpropanolamine, N-trimethylsilyl-, trimethylsilyl ether                                                       |
| p-Methoxyamphetamine, N-trimethylsilyl-                                                                            |
| (R)-(-)-Phenylephrine, N-trimethylsilyl-, bis(trimethylsilyl) ether                                                |
| (R)-9-[(S)-2-(Hydroxymethyl)pyrrolidin-1-yl]-3-methyl-3,4-dihydro-2H-benzo[b][1,4,5]oxathiazepine 1,1-dioxide      |
| (S,E)-8,12,15,15-Tetramethyl-4-methylenebicyclo[9.3.1]pentadeca-7,11-diene                                         |
| (Z)-2-(Heptadec-10-en-1-yl)-4,5-dihydro-1H-imidazole                                                               |
| (Z)-Docos-13-enamide, N-TMS                                                                                        |
| (Z)-Docos-9-enenitrile                                                                                             |
| [1,1'-Biphenyl]-4,4'-diamine, 3,3',5,5'-tetramethyl-                                                               |
| 1-(1-Butoxy-2-propoxy)-2-propanol, TMS derivative                                                                  |
| 1-(2,4-Dimethoxyphenyl)-propan-2-one                                                                               |
| 1-(2,5-Dimethoxyphenyl)-1-[(trimethylsilyl)oxy]propan-2-amine                                                      |
| 1-(2-Methoxy-1-methylethoxy)-2-propanol, TMS derivative                                                            |
| 1-(Ethoxycarbonylmethyl)pyridinium bromide                                                                         |
| 1,1,3,3,5,5,7,7-Octamethyl-7-(2-methylpropoxy)tetrasiloxan-1-ol                                                    |
| 1,11-Dodecadiene                                                                                                   |
| 1,15-Hexadecadiene                                                                                                 |
| 1,19-Eicosadiene                                                                                                   |
| 1,2,3-Butanetriol, 3TMS derivative                                                                                 |
| 1,2-Benzenedicarboxylic acid, bis(2-ethylhexyl) ester                                                              |
| 1,2-Benzenedicarboxylic acid, bis(2-methylpropyl) ester                                                            |
| 1,2-Benzenedicarboxylic acid, dinonyl ester                                                                        |
| 1,2-Benzenediol, O-(4-methoxybenzoyl)-O'-(2-furoyl)-                                                               |
| 1,2-Benzisothiazole                                                                                                |
| 1,2-Cyclohexanedicarboxylic acid, 2-ethylhexyl nonyl ester                                                         |
| 1,2-Cyclohexanedicarboxylic acid, 2-methylpent-3-yl nonyl ester                                                    |
| 1,2-Cyclohexanedicarboxylic acid, cyclohexylmethyl nonyl ester                                                     |
| 1,2-Cyclohexanedicarboxylic acid, dinonyl ester                                                                    |
| 1,2-Cyclohexanedicarboxylic acid, heptadecyl 2-methylcyclohexyl ester                                              |
| 1,2-Ethenediol, 2TMS derivative                                                                                    |
| 1,3,5-Trioxepane                                                                                                   |
| 1,3-Bis(trimethylsilyloxy)pentane                                                                                  |
| 1,3-di-iso-propylnaphthalene                                                                                       |
| 1,3-Dioxolane, 2-butyl-                                                                                            |
| 1,3-Dioxolane, 2-heptyl-                                                                                           |
| 1,3-Dipentyl-heptabarbital                                                                                         |
| 1,3-Diphenyl-2-azafluorene                                                                                         |
| 1,3-Propanediol, 2TMS derivative                                                                                   |
| 1,4-Benzenedicarboxylic acid, bis(2-ethylhexyl) ester                                                              |
| 1,4-Butanediol, 2TMS derivative                                                                                    |
| 1,5-Anhydroglucitol, 4TMS derivative                                                                               |
| 1,5-Heptadiene, 3,4-dimethyl-                                                                                      |
| 1,6-Dioxacyclododecane-7,12-dione                                                                                  |
| 1,8,11-Heptadecatriene, (Z,Z)-                                                                                     |
| 10,18-Bisnorabieta-8,11,13-triene                                                                                  |

---

10H-Phenoxaphosphine, 2-chloro-8-ethyl-10-hydroxy-, 10-oxide  
10-Undecen-1-ol, TMS derivative  
10-Undecen-1-yl acetate  
11,14-Eicosadienoic acid  
11,14-Eicosadienoic acid, methyl ester  
11-Eicosenoic acid, (E)-,TMS derivative  
11-Hexacosyne  
11-Hydroxy-.DELTA.-9-tetrahydrocannabinol, bis(trimethylsilyl) ether  
11-Octadecynenitrile  
13-Bromotetradecanoic acid  
13-Docosen-1-ol, (Z)-  
13-Docosenamide, (Z)-  
16-Octadecenoic acid, methyl ester  
18-Methyl-eicosane-1,2-diol, isopropylidene derivative  
19-Norepietiocholanolone acetate  
1-Aminocyclopentanecarboxylic acid, 3-chloropropoxycarbonyl-, tridecyl ester  
1-Butoxy-2-propanol, TMS derivative  
1-Chloroundecane  
1-Cyclohexylethanol, TMS derivative  
1-Decanol, 2-methyl-  
1-Decene  
1-Deoxypentitol, 4TMS derivative  
1-Diphenyl(tert-butyl)silyloxy-4-methoxybenzene  
1-Dodecanol  
1-Dodecanol, 2-hexyl-  
1-Dodecanol, TMS derivative  
1-Ethyl-2-dimethyl(octyl)silyloxycyclohexane  
1-Heneicosanol  
1-Hexacosene  
1-Hexadecanol, 3,7,11,15-tetramethyl-  
1-Hexadecanol, TBDMS derivative  
1-Hexadecanol, TMS derivative  
1-Hexanone, 5-methyl-1-phenyl-  
1-Hexene, 2,5,5-trimethyl-  
1H-Imidazole, 2-heptadecyl-4,5-dihydro-  
1H-Imidazole, 4,5-dihydro-2-hexadec-9Z-enyl-  
1H-Indene, 1-ethylidene-  
1H-Indene, 1-hexadecyl-2,3-dihydro-  
1H-Indene, 1-methylene-  
1H-Quinolin-2-one, 5,8-dimethoxy-1,4-dimethyl-  
1-Methyl-5-mercaptotetrazole  
1-Mono-isobutyrim, 2TMS derivative  
1-Monolinolein, 2TMS derivative  
1-Monomyristin, 2TMS derivative  
1-Monopalmitin, 2TMS derivative  
1-Naphthalenecarboxamide, N-(3-chlorophenyl)-  
1-Naphthamide, N-(4-chlorophenyl)-  
1-Octacosanol, 2,4,6,8-tetramethyl-, (all-R)-  
1-Octadecanol, TBDMS derivative  
1-Octadecanol, TMS derivative  
1-Octanol, 2,2-dimethyl-  
1-Octanol, 2-butyl-  
1-Octanol, 3,7-dimethyl-  
1-Octene, 6-methyl-  
1-Pentanol, 2-ethyl-4-methyl-  
1-Pentene, 2,4,4-trimethyl-  
1-Phenyl-1,2-ethanediol, 2TMS derivative  
1-Propanol, TMS derivative

---

---

1-Propene-1-thiol  
 1-Tetracosene  
 1-Tetradecene  
 1-Tricosene  
 1-Undecanol, TMS derivative  
 2-(2,5-Dimethoxy-phenyl)-propionaldehyde  
 2(3H)-Furanone, 5-hexyldihydro-  
 2-(4'-Methoxyphenyl)-2-(3'-methyl-4'methoxyphenyl)propane  
 2,2,7,7-Tetramethyltricyclo[6.2.1.0(1,6)]undec-4-en-3-one  
 2,2-Dimethyl-3-heptene trans  
 2,2'-Dithiobisethanol, 2TMS derivative  
 2,2'-Heptamethylene-di-2-imidazoline  
 2,3,4-Trihydroxybutyric acid tetrakis(trimethylsilyl) deriv., (, (R\*,R\*)-)  
 2,3-Butanediol, 2TMS derivative  
 2,3-Dihydro-1H-2-isopropylcyclopenta[b]quinoxaline  
 2,3-Dihydroxypropyl icosanoate, 2TMS derivative  
 2,3-Dimethoxyphenol, TMS  
 2,4,6,8-Tetramethyl-1-undecene  
 2,4,6-Tris(1,1-dimethylethyl)-4-methylcyclohexa-2,5-dien-1-one  
 2,4,7,9-Tetramethyl-5-decyne-4,7-diol, 2TMS derivative  
 2,4-Dichlorobenzoic acid, TMS derivative  
 2,4-Dihydroxybenzoic acid, 3TMS derivative  
 2,4-Di-tert-butylphenol  
 2,4-Thiazolidinedione  
 2,5-cyclohexadiene-1,4-dione, 2-(1,1-dimethylethyl)-5-(2-methyl-2-propen-1-yl)-  
 2,5-Cyclohexadiene-1,4-dione, 2,6-bis(1,1-dimethylethyl)-  
 2,5-Dihydroxy-4-methoxyacetophenone  
 2,5-Dimethoxy-4-methylamphetamine, N-(trimethylsilyl)-  
 2,5-Dimethoxybenzoic acid, TMS derivative  
 2,5-Dimethoxymandelic acid, di-TMS  
 2,5-Dimethoxyphenol, TMS  
 2',5'-Dimethoxypropiophenone  
 2,5-Hexanediol, 2TMS derivative  
 2,6,8-Trimethyl-4-nonyl acetate  
 2,6-Bis(tert-butyl)phenol, TMS derivative  
 2,6-Dimethyldecane  
 2,6-di-tert-Butyl-4-(dimethylaminomethyl)phenol  
 2-[2-[2-Methoxyethoxy]ethoxy-1,3-dioxalane  
 2-Acetoxyindane  
 2-Acetylmethylamino-4,5,6,7-tetrahydrobenzothiazol-7-one  
 2-Allyl-1,4-dimethoxybenzene  
 2-Amino-2-deoxyhexose, 5TMS derivative  
 2-Amino-4-(1-ethylpropyl)-4H-benzo[h]chromene-3-carbonitrile  
 2-Aminobenzoxazole, 2TBDMS derivative  
 2-Aminomalonic acid, N,O,O,-TMS  
 2-Aminosuccinonitrile  
 2-Benzothiazolamine, N-ethyl-  
 2-Butene-1,4-diol, (E)-, 2TMS derivative  
 2-Butylamine, N-tetradecyl-  
 2-Decanol, TMS derivative  
 2-Decene, 7-methyl-, (Z)-  
 2-Dodecene, (Z)-  
 2-Ethoxyethanol, TMS derivative  
 2-Ethyl-acridone  
 2-Ethylhexanal ethylene glycol acetal  
 2-Ethylhexanoic acid, TMS derivative  
 2H-Cyclopropa[a]naphthalen-2-one, 1,1a,4,5,6,7,7a,7b-octahydro-1,1,7,7a-tetramethyl-, (1a?,7?,7a?,7b?)-  
 2-Heptanol, TBDMS derivative

---

---

2-Hexene, 3,5,5-trimethyl-  
2-Hexene, 3,5-dimethyl-  
2-Hexyl-1-octanol  
2-Hydroxy-2-methylbutyric acid, 2TMS derivative  
2-Hydroxy-4-methoxybenzaldehyde, TMS derivative  
2-Hydroxy-5-methoxybenzaldehyde, TMS derivative  
2-Hydroxymandelic acid, ethyl ester, di-TMS  
2-Imidazolidinone  
2-Isopropyl-5-methyl-1-heptanol  
2-Methoxybenzoic acid, 2,3-dichlorophenyl ester  
2-Methyl-1,2-bis(trimethylsilyloxy)butane  
2-Methyl-1,3-butanediol, 2TMS derivative  
2-Methyl-1,3-butanediol, TBDMS derivative  
2-Methyl-3-buten-2-ol, TMS derivative  
2-Methylbicyclo[3.2.1]octane  
2-Methyl-E-7-hexadecene  
2-Monomyristin, 2TMS derivative  
2-Monostearin, 2TMS derivative  
2-Naphthalenol, 8-amino-  
2-Nonenal  
2-Oxopentanoic acid, TMS derivative  
2-Palmitoylglycerol, 2TMS derivative  
2-Pentanethiol, 2-methyl-  
2-Phenylisopropanol, TMS derivative  
2-Propanol, 1-[2-(2-methoxy-1-methylethoxy)-1-methylethoxy]-  
2-Propanol, 2-methyl-  
2-Propanone, 1,1,3,3-tetrabutoxy-  
2-tert-Butoxytetrahydrofuran  
2-Undecanethiol, 2-methyl-  
3,3,13,13-Tetraethylpentadecane  
3,3-Dichloropropyne  
3,4-Dimethoxymandelic acid, di-TMS  
3,4-Dimethyl-2-(3-methyl-butyl)-benzoic acid, methyl ester  
3,5-Diacetyl-4-methyl-1-phenyl-1,4-dihydropyridine  
3,5-Dimethoxymandelic acid, di-TMS  
3,5-Dimethoxymandelic amide, di-TMS  
3,7-Dimethyloctyl acetate  
3-[1-(4-Cyano-1,2,3,4-tetrahydronaphthyl)]propanenitrile  
3-[3-(4-Hydroxyphenyl)-3-oxoprop-1-en-1-yl]-6-methylchromen-4-one  
3-Allyl-5-(1H-indol-3-ylmethyl)-2-thioxo-imidazolidin-4-one  
3-Chlorobenzoic acid, TMS derivative  
3-Dodecanol, 3,7,11-trimethyl-  
3-Ethyl-2-methyl-2-heptanol  
3-Ethyl-3-methylheptane  
3-Ethyl-3-methylnonadecane  
3-Ethylpentan-3-ol, trimethylsilyl ether  
3H-1,2,4-Triazole-3-thione, 5-amino-1,2-dihydro-  
3-Hydroxy-3-phenylbutan-2-one  
3-Hydroxybutyric acid, 2TMS derivative  
3-Methoxyamphetamine, 4-trimethylsilyloxy, N-trimethylsilyl-  
3-Methoxy-benzoic acid 3,4-dimethyl-phenyl ester  
3-Methyl-1,3-bis(trimethylsilyloxy)butane  
3-Methyl-2-butanol, TMS derivative  
3-Methylvaleric acid, TMS  
3-pentulosonic acid, 2,4,5-tris-O-(trimethylsilyl)-, trimethylsilyl ester  
3-Phenanthrenol, 4b,5,6,7,8,8a,9,10-octahydro-2,4b,8,8-tetramethyl-, (4bS,8aS)-  
3-Phenyl-2-butanol, TMS derivative  
3-Phenyllactic acid, 2TMS derivative

---

---

3-Pyridinol, TMS derivative  
4b,8-Dimethyl-2-isopropylphenanthrene, 4b,5,6,7,8,8a,9,10-octahydro-  
4-Benzyl-4,5-dihydroisoxazole  
4-Chlorobenzoic acid, TMS derivative  
4-Cyano-4-methylthio-tetracyclo(6,2,1,1(3,6).0(2,7)dodec-9-ene  
4-Decene, 7-methyl-, (E)-  
4-Dodecene, (E)-  
4-Hydroxy-3,4,6-trimethylhept-5-enoic acid lactone  
4-Methoxybenzoic acid, 4-isopropylphenyl ester  
4-Methoxyphenol, TMS derivative  
4-Methylethcathinone, N-trimethylsilyl-  
4-Methylpentan-2-ol, tert-butyldimethylsilyl ether  
4-Methylvaleric acid, TMS derivative  
4-Pentene-2-ol, 2-methyl  
4-Pyridinol, TMS derivative  
4-Trimethylsilylphenol  
5,2,1,6,3,4-[2,3]Butanediyl[1,4]diylidenedipentaleno[2,1,6-cde:2',1',6'-gha]pentalene, hexadecahydro-  
5,5-Dimethyl-1,3-dioxane-2-ethanol, TMS derivative  
5,6,7,8,9,10-Hexahydrobenzocyclooctene  
5,6-Dimethyl-4-phenyl-3-cyanopyridine-2(1H)-thione  
5?-Androstan-3?-ol, O-acetyl-  
5?-Androstan-3?-ol, O-ethyl-  
5-Cyano-2-methyl-4-methylthio-6-phenylpyrimidine  
5-Dodecene, (E)-  
5-Eicosene, (E)-  
5-Ethyldecane  
5-Hydroxytryptophan, 4TMS derivative  
5-Methyl-2-(2-methyl-2-tetrahydrofuryl)tetrahydrofuran  
5-Methyluridine, 3TMS derivative  
5-Nitro-3-phenyl-1H-indazole  
5-Nonanol, TMS derivative  
5-Oxoproline, 2TMS derivative  
6-(4-Fluorophenyl)-4-phenyl-3-cyanopyridine-2(1H)-thione  
6,9-Heptadecadiene  
6-Dodecyne  
6-Methoxy-3-methylbenzofuran  
6-Nonenal, (E)-  
6-Tetradecene, (E)-  
6-Tridecene  
7,9-Di-tert-butyl-1-oxaspiro(4,5)deca-6,9-diene-2,8-dione  
7-Acetyl-6-ethyl-1,1,4,4-tetramethyltetralin  
7-Isopropyl-1,1,4a-trimethyl-1,2,3,4,4a,9,10,10a-octahydrophenanthrene  
7-Methyl-Z-tetradecen-1-ol acetate  
7-Tetradecene, (E)-  
8-Hexadecyne  
8-Methyl-6-nonenamide  
8-Methylnonanoic acid, trimethylsilyl ester  
9(E),11(E)-Conjugated linoleic acid, trimethylsilyl ester  
9,10-Anthracenedione, 1,4-diamino-2,3-dihydro-  
9,11-Octadecadienoic acid, methyl ester, (E,E)-  
9,12,15-Octadecatrienoic acid, ethyl ester, (Z,Z,Z)-  
9,12-Octadecadienoic acid (Z,Z)-  
9,12-Octadecadienoic acid (Z,Z)-, 2-hydroxy-1-(hydroxymethyl)ethyl ester  
9,12-Octadecadienoic acid (Z,Z)-, methyl ester  
9,12-Octadecadienoic acid, ethyl ester  
9,12-Octadecadienoic acid, methyl ester  
9-Octadecen-1-ol, (Z)-  
9-Octadecen-1-ol, acetate, (Z)-

---

---

9-Octadecenamide, (Z)-  
 9-Octadecenitrile, (Z)-  
 9-Octadecenoic acid, (E)-, TMS derivative  
 9-Octadecynitrile  
 9-Tricosene, (Z)-  
 Acetic acid, 7,7,10a,12a-tetramethyl-2,5-dioxo-1,2,3,4,4a,4b,5,7,8,9,10,10a,10b,11,12,12a-hexadecahydro-1-azachrysen-8-yl  
 ester  
 Acetic acid, bis[(trimethylsilyl)oxyl]-, trimethylsilyl ester  
 Acetic acid, dimethoxy-, methyl ester  
 Acetic acid, TMS derivative  
 Acrylic acid, 2,3-bis[(trimethylsilyl)oxy]-, trimethylsilyl ester  
 Adonitol, 5TMS derivative  
 Ala-?-Ala, N-trimethylsilyl-, trimethylsilyl ester  
 Alanine, N-methyl-n-butoxycarbonyl-, undecyl ester  
 Alanine, N-methyl-N-ethoxycarbonyl-, dodecyl ester  
 Alanine, N-methyl-N-ethoxycarbonyl-, pentadecyl ester  
 Alanine, N-methyl-N-isobutoxycarbonyl-, isohexyl ester  
 Alanine, N-methyl-N-methoxycarbonyl-, undecyl ester  
 Alanylalanine, N,N'-dimethyl-N'-methoxycarbonyl-, hexyl ester  
 Alanylalanine, N,N'-dimethyl-N'-methoxycarbonyl-, pentyl ester  
 Alanylglycine, 2TMS derivative  
 Allonic acid, ?-lactone, 4TMS derivavative  
 alpha-(4-DIMETHYLAMINOPHENYL)-?(9-PHENANTHRYL)DECANE  
 alpha-D-(-)-Lyxopyranose, 4TMS derivative  
 alpha-D-(+)-Talopyranose, 5TMS derivative  
 alpha-D-Allopyranose, 5TMS derivative  
 alpha-D-Arabinopyranose, 4TMS derivative  
 alpha-D-Glucopyranose, 5TMS derivative  
 alpha-D-Mannopyranose, 5TMS derivative  
 alpha-D-Xylopyranose, 4TMS derivative  
 alpha-Farnesene  
 alpha-Hydroxyisobutyric acid, 2TMS derivative  
 alpha-L-6-Deoxymannopyranose, 4TMS derivative  
 alpha-Methyl-L-tyrosine, 3TMS derivative  
 Androstane, (5?)-  
 Anthra[1,9-cd]pyrazol-6(2H)-one  
 Anthranilic acid, TMS derivative  
 Arabinitol, 5TMS derivative  
 Arabinofuranose, 1,2,3,5-tetrakis-O-(trimethylsilyl)-  
 Arabinose, 4TMS derivative  
 Arachidic acid, TMS derivative  
 Aspartic acid, 3TMS derivative  
 Behenic acid, TMS derivative  
 Benzaldehyde, 2,5-dimethoxy-  
 Benzamide, N-(1,1-dimethylethyl)-  
 Benzamide, N-propyl-  
 Benzenamine, 4-(6-methyl-2-benzothiazolyl)-  
 Benzenamine, N,N-diethyl-3-methyl-  
 Benzenamine, N,N-diethyl-4-methyl-  
 Benzene, (1-butylheptyl)-  
 Benzene, (1-methyldodecyl)-  
 Benzene, (1-methylethyl)-  
 Benzene, (1-methyltridecyl)-  
 Benzene, (1-methylundecyl)-  
 Benzene, (1-pentylheptyl)-  
 Benzene, [1-[[1-(1-methylethyl)-3-butenyl]oxy]ethyl]-, [S-(R\*,R\*)]-  
 Benzene, 1,1'-(1-ethenyl-1,3-propanediyl)bis-  
 Benzene, 1,1'-(oxydiethylidene)bis-

---

---

Benzene, 1,2,3-trimethyl-  
Benzene, 1,2,4-trimethyl-  
Benzene, 1,4-dimethoxy-  
Benzene, 1-ethyl-2-methyl-  
Benzene, 1-ethyl-3-methyl-  
Benzene, 1-ethyl-4-methyl-  
Benzene, 1-methyl-4-propyl-  
Benzene, 4-butyl-1,2-dimethoxy-  
Benzene, propyl-  
Benzeneacetic acid, TBDMS derivative  
Benzeneethanol,  $\gamma$ -ethenyl-  
Benzenemethanol,  $\gamma$ -(1-aminobutyl)-, N-trimethylsilyl-, trimethylsilyl ether  
Benzenemethanol,  $\gamma,\gamma$ -dimethyl-  
Benzenepropanoic acid, 3,5-bis(1,1-dimethylethyl)-4-hydroxy-, methyl ester  
Benzoic acid, 2-hydroxy-3-[(2-hydroxy-4-methoxy-6-propylbenzoyl)oxy]-4-methoxy-6-propyl-, methyl ester  
Benzoic acid, methyl ester  
Benzoic Acid, TBDMS derivative  
Benzoic Acid, TMS derivative  
Benzophenone  
Benzothiazole  
Benzothiazole, 2-(4-amino-3-methylphenyl)-  
Benzothiazole, 2-(o-aminophenyl)-4-methyl-  
Benzyl alcohol, TMS derivative  
beta-D-(+)-Mannopyranose, 5TMS derivative  
beta-D-(+)-Talopyranose, 5TMS derivative  
beta-D-Allopyranose, 5TMS derivative  
beta-D-Glucopyranose, 5TMS derivative  
beta-Hydroxypyruvic acid, trimethylsilyl ether, trimethylsilyl ester  
beta-L-Arabinopyranose, 4TMS derivative  
Biphenyl-4,4'-dicarboxylic acid, bis-(4-pentyl-phenyl) ester  
Bisphenol A monomethyl ether, TMS derivative  
Bisphenol A, 2TMS derivative  
Bisphenol A, TMS derivative  
Boric acid, 3TMS derivative  
Butanal, oxime  
Butane, 2,3-dimethoxy-2-methyl-  
Butane-1,3-diol, 1-methylene-3-methyl-, bis(trimethylsilyl)ether  
Butanedioic acid, 2TMS derivative  
Butyl 9,12,15-octadecatrienoate  
Butyl 9,12-octadecadienoate  
Butylated Hydroxytoluene  
Butylone, N-trimethylsilyl-  
Butyric Acid, TMS derivative  
Cadaverine, 4TMS derivative  
Carbitol, TMS derivative  
Chavicol TMS  
Cholesterol, TMS derivative  
Chrysophanol, 2TMS derivative  
Citric acid, 4TMS derivative  
Cyanuric acid, 3TMS derivative  
Cyclobutanecarboxylic acid, 2-propenyl ester  
Cyclododecane  
Cyclohexane, (1-hexadecylheptadecyl)-  
Cyclohexane, 1-methyl-4-(1-methylethenyl)-, trans-  
Cyclohexanemethanol, 4-methyl-, trans-  
Cyclohexanol, TMS derivative  
Cyclohexanone, 3,3,5-trimethyl-  
Cyclohexene, 1-butyl-

---



---

Cyclohexene,3-propyl-  
 Cyclooctane, 1,4-dimethyl-, cis-  
 Cyclopenta[g]-2-benzopyran, 1,3,4,6,7,8-hexahydro-4,6,6,7,8,8-hexamethyl-  
 Cyclopentane, 1,1,3,3-tetramethyl-  
 Cyclopentane, 1,1'-hexadecylidenebis-  
 Cyclopentane, nonyl-  
 Cyclopentane, undecyl-  
 Cyclopentanone, 2,2,4-trimethyl-  
 Cyclopropane, 1-(1-hydroxy-1-heptyl)-2-methylene-3-pentyl-  
 Cyclopropane, 1-hexyl-2-methyl-  
 Cyclopropane, 1-methyl-2-(3-methylpentyl)-  
 D-(-)-Erythrofuranose, tris(trimethylsilyl) ether (isomer 1)  
 D-(-)-Fructofuranose, pentakis(trimethylsilyl) ether (isomer 1)  
 D-(-)-Fructofuranose, pentakis(trimethylsilyl) ether (isomer 2)  
 D-(-)-Fructopyranose, 5TMS derivative (isomer 1)  
 D-(-)-Ribofuranose, tetrakis(trimethylsilyl) ether (isomer 1)  
 D-(-)-Ribofuranose, tetrakis(trimethylsilyl) ether (isomer 2)  
 D-(-)-Tagatofuranose, pentakis(trimethylsilyl) ether (isomer 1)  
 D-(-)-Tagatofuranose, pentakis(trimethylsilyl) ether (isomer 2)  
 D-(+)-Arabitol, 5TMS derivative  
 D-(+)-Galactopyranose, 5TMS derivative (isomer 2)  
 D-(+)-Talofuranose, pentakis(trimethylsilyl) ether (isomer 2)  
 D-(+)-Xylose, 4TMS derivative  
 D-Alanine, N-ethoxycarbonyl-, undecyl ester  
 D-Allofuranose, pentakis(trimethylsilyl) ether  
 D-Arabinopyranose, 4TMS derivative (isomer 2)  
 Decane  
 Decane, 2,3,5-trimethyl-  
 Decane, 2,6,7-trimethyl-  
 Decane, 4-methyl-  
 Decane, 5,6-dimethyl-  
 Decanoic acid, TMS derivative  
 Decyl oleate  
 D-Erythro-Pentitol, 2-deoxy-1,3,4,5-tetrakis-O-(trimethylsilyl)-  
 D-Fructose, 5TMS derivative  
 D-Fucitol, 5TMS derivative  
 D-Glucopyranose, 5TMS derivative  
 D-Glucose, 5TMS derivative  
 Dicyclopentadiene  
 Diethyl aminomalonate, TMS derivative  
 Diethylene glyco, TMS derivative  
 Diethylene glycol, 2TMS derivative  
 Diethylene glycol, n-butyl ether, trimethylsilyl ether  
 Diglycerol, 4TMS derivative  
 Dihydroxyacetone, 2TMS derivative  
 Dimethyl hexopyranosiduronate, ?-D-, 3TMS derivative  
 Dinaphtho(1,2-b:2',1'-d)thiophene  
 Disulfide, di-tert-dodecyl  
 dl-2-Phenyl-1,2-propanediol  
 dl-7-Azatryptophan  
 dl-Alanine ethyl ester  
 DL-Arabinopyranose, 4TMS derivative  
 D-Lyxose, 4TMS derivative  
 D-Mannopyranose, 5TMS derivative  
 D-Mannose, 5TMS derivative  
 D-Norleucine, N-ethoxycarbonyl-, dodecyl ester  
 Docosane  
 Docosanol, TBDMS derivative

---

---

Docosyl octyl ether  
Dodecane  
Dodecane, 2,6,11-trimethyl-  
Dodecane, 2,7,10-trimethyl-  
Dodecane, 4,6-dimethyl-  
Dodecanoic acid, ethenyl ester  
Dodecanoic acid, methyl ester  
Dodecanoic acid, TMS derivative  
Dopamine, 4TMS derivative  
D-Psicofuranose, pentakis(trimethylsilyl) ether (isomer 1)  
D-Psicofuranose, pentakis(trimethylsilyl) ether (isomer 2)  
D-Psicopyranose, 5TMS derivative (isomer 2)  
D-Ribofuranose, 5-deoxy-5-(methylsulfinyl)-1,2,3-tris-O-(trimethylsilyl)-  
D-Ribose, 4TMS derivative  
D-Xylopyranose, 4TMS derivative  
D-Xylose, 4TMS derivative  
E-11(12-Cyclopropyl)dodecen-1-ol acetate  
E-11-Hexadecen-1-ol  
E-8-Methyl-9-tetradecen-1-ol acetate  
E-9-Tetradecenoic acid  
Eicosane  
Eicosane, 2-methyl-  
Eicosanenitrile  
Eicosanoic acid, methyl ester  
Eicosyl nonyl ether  
Ephedrine, 2TMS derivative  
Erythritol, 4TMS derivative  
Ethanimidic acid, N-(trimethylsilyl)-, trimethylsilyl ester  
Ethanone, 1,1'-(1,4-phenylene)bis-  
Ethyl 3-hydroxybutyrate, TMS derivative  
Ethyl 9,12-hexadecadienoate  
Ethylene glycol - Adipate - Diethylene glycol  
Ethylene glycol butyl ether, trimethylsilyl ether  
Ethylene glycol, 2TMS derivative  
Ethylene glycol, TMS derivative  
Ethylene sebacate  
Formamide, N-methyl-  
Fructofuranoside, methyl 1,3,4,6-tetrakis-O-(trimethylsilyl)-, ?-D-  
Fumaric acid, pent-4-en-2-yl tetradecyl ester  
Furfuryl alcohol, TMS derivative  
Galactopyranose, 5TMS derivative  
Gluconolactone (3R,4S,5R,6R)-, 4TMS derivative  
Gluconolactone, 4TMS derivative  
Glucopyranose, 5TMS derivative  
Glucose, 5TMS derivative  
Glucuronolactone, trisO-(trimethylsilyl)-  
Glyceric acid, 3TMS derivative  
Glycerol monostearate, 2TMS derivative  
Glycerol, 3TMS derivative  
Glycine, 3TMS derivative  
Glycine, di-TMS  
Glycine, N-methyl-N-ethoxycarbonyl-, decyl ester  
Glycine, N-methyl-N-ethoxycarbonyl-, nonyl ester  
Glycine, N-methyl-N-ethoxycarbonyl-, octyl ester  
Glycolic acid, 2TMS derivative  
Glyoxime, 2TMS derivative  
Heneicosane  
Heneicosane, 11-decyl-

---

---

Heneicosane, 3-methyl-  
Heneicosanoic acid, TMS derivative  
Henicos-1-ene  
Hentriacontane  
Heptacosane  
Heptadecane  
Heptadecane, 2,6,10,15-tetramethyl-  
Heptadecane, 2-methyl-  
Heptadecanenitrile  
Heptadecanoic acid, glycerine-(1)-monoester, bis-O-trimethylsilyl-  
Heptadecanoic acid, TMS derivative  
Heptamethyl-3-phenyl-1,4-cyclohexadiene  
Heptanamide, 4-ethyl-5-methyl-  
Heptane, 2,2,4,6,6-pentamethyl-  
Heptane, 2,5,5-trimethyl-  
Heptane, 3,3,5-trimethyl-  
Heptanoic acid, TMS derivative  
Hexacosane  
Hexacosanoic acid, TMS derivative  
Hexadecanamide  
Hexadecane  
Hexadecane, 2,6,10,14-tetramethyl-  
Hexadecane, 2,6,11,15-tetramethyl-  
Hexadecane, 2-methyl-  
Hexadecane, 7-methyl-  
Hexadecane-1,2-diol  
Hexadecanenitrile  
Hexadecanoic acid, butyl ester  
Hexadecanoic acid, methyl ester  
Hexan-3-ol, trimethylsilyl ether  
Hexane, 4-ethyl-2-methyl-  
Hexanedioic acid, 2TMS derivative  
Hexanedioic acid, bis(2-ethylhexyl) ester  
Hexanedioic acid, dioctyl ester  
Hexanoic acid, TMS derivative  
Hexatriacontane  
Hexopyranose, 5TMS derivative  
Hexyl octyl ether  
Hydroquinone, TMS derivative  
Hydroxylamine, methyl-(1-phenylethyl)-  
Hydroxylamine, O-(3-methylbutyl)-  
Hydroxylamine, O-pentyl-  
Indane  
Indeno[2',1':4,5]thieno[3,2-b]thiopyran  
Inosose-2, 1,3,4,5,6-pentakis-O-(trimethylsilyl)-, myo-  
Isobutanol, TMS derivative  
Isobutyl triacontyl ether  
Isopropyl alcohol, TMS derivative  
Isopropyl palmitate  
Isopropylamine, N-tert-butyldimethylsilyl-  
Isoquinoline, 1,2,3,4-tetrahydro-6,7-dimethoxy-  
Isoquinoline, 3,4-dihydro-6,7-dimethoxy-1-[3-methoxyphenyl]-  
L-(-)-Arabitol, 5TMS derivative  
L-(-)-Sorbofuranose, pentakis(trimethylsilyl) ether  
L-(+)-Rhamnopyranose, 4TMS derivative  
L-5-Oxoproline, , 2TMS derivative  
Labda-8(20),14-dien-13-ol, (13S)-, O-TMS  
Lactic acid dimer, bis(trimethylsilyl)-

---

---

Lactic Acid, 2TMS derivative  
L-Alanine ethylamide, (S)-  
L-Alanine, 2TMS derivative  
L-Aspartic acid, diethyl ester  
Levoglucosan, 3TMS derivative  
Levulinic acid, TMS derivative  
L-Homophenylalanine, N-(n-pentyl)-, pentyl ester  
Lignoceric acid, TMS derivative  
Linoleyl acetate  
Linolool oxide, (Z)-, TMS derivative  
L-Norleucine, N-ethoxycarbonyl-, decyl ester  
L-Norleucine, N-methoxycarbonyl-, isohexyl ester  
L-Norleucine, N-methoxycarbonyl-, octyl ester  
L-Norleucine, N-methoxycarbonyl-, pentyl ester  
L-Norvaline, N-ethoxycarbonyl-, isohexyl ester  
L-Norvaline, N-ethoxycarbonyl-, nonyl ester  
L-Norvaline, N-methoxycarbonyl-, heptyl ester  
L-Norvaline, N-methoxycarbonyl-, nonyl ester  
L-Norvaline, N-methoxycarbonyl-, octyl ester  
L-Norvaline, N-methoxycarbonyl-, pentyl ester  
L-Norvaline, N-methoxycarbonyl-, tetradecyl ester  
L-Norvaline, n-propargyloxycarbonyl-, heptyl ester  
L-Norvaline, n-propargyloxycarbonyl-, propargyl ester  
L-Norvaline, n-propoxycarbonyl-, undecyl ester  
L-Norvaline, trimethylsilyl ester  
L-Phenylalanine, 2TMS derivative  
L-Rhamnose, 4TMS derivative  
L-Sorbopyranose, (1S,2R,3S)-, 5TMS derivative  
L-Threitol, 4TMS derivative  
L-Threonine, 3TMS derivative  
L-Val-L-Leu, N-trimethylsilyl-, trimethylsilyl ester  
Malic acid, 3TMS derivative  
Malonic acid, bis(2-trimethylsilylethyl) ester  
m-Aminophenylacetylene  
Mercaptoethanol, 2TMS derivative  
Mesitylene  
meso-Erythritol, 4TMS derivative  
Metanephine, 3TMS derivative  
Methamphetamine, N-TMS  
Methiopropamine, N-trimethylsilyl-  
Methyl (2R,3R,4S)-2,4-dimethyl-3-hydroxyhexanoate  
Methyl (3,4-dimethoxyphenyl)(hydroxy)acetate, TMS derivative  
Methyl 4-methoxysalicylate, TMS derivative  
Methyl 9-cis,11-trans-octadecadienoate  
Methyl galactoside, 4TMS derivative  
Methyl pentopyranoside, 3TMS derivative  
Methyl stearate  
Methyl vinyl ketone  
Methyl Z-11-tetradecenoate  
Monolaurin, 2TMS derivative  
m-Toluic acid, TMS derivative  
Myristic acid, TMS derivative  
Naphthalene  
Naphthalene, 1,2,3,4-tetrahydro-1,6-dimethyl-4-(1-methylethyl)-, (1S-cis)-  
Naphthalene, 1-methyl-  
Naphthalene, 5-ethyl-1,2,3,4-tetrahydro-  
Naphthalene, 6-ethyl-1,2,3,4-tetrahydro-  
n-Hexadecanoic acid

---

---

n-Nonadecanol-1  
Nonacosan-10-ol, O-TMS  
Nonadecanenitrile  
Nonadecanoic acid, TMS derivative  
Nonane, 2,6-dimethyl-  
Nonane, 5-methyl-5-propyl-  
Nonanoic acid, TMS derivative  
n-Propyl 9,12-octadecadienoate  
N-Trimethylsilylstearamide  
Octacosane  
Octadecanamide  
Octadecanamide, N-(2-methylpropyl)-N-nitroso-  
Octadecane  
Octadecane, 2-methyl-  
Octadecanenitrile  
Octadecanoic acid, 2-methylpropyl ester  
Octadecanoic acid, 2-oxo-, methyl ester  
Octadecanoic acid, ethenyl ester  
Octadecanoic acid, phenylmethyl ester  
Octaethylene glycol, 2TMS derivative  
Octan-2-yl palmitate  
Octane, 2,3,6,7-tetramethyl-  
Octane, 2,3,7-trimethyl-  
Octane, 3,3-dimethyl-  
Octane, 3,5-dimethyl-  
Octane, 6-ethyl-2-methyl-  
Octanoic acid, TMS derivative  
Octopamine, 4TMS derivative  
Oleamide, TMS derivative  
Oleic Acid  
Oleic Acid, (Z)-, TMS derivative  
Oleic acid, butyl ester  
Orthoformic acid, triisobutyl ester  
Oxalic acid, 2TMS derivative  
Oxalic acid, heptyl propyl ester  
Oxime-, methoxy-phenyl-  
Palmitelaidic acid, TMS derivative  
Palmitic Acid, TMS derivative  
Palmitoleamide  
Palmitoleonitrile  
p-Anisic acid, tridec-2-ynyl ester  
Pentacosane  
Pentacosanoic acid, trimethylsilyl ester  
Pentadecane  
Pentadecane, 2,6,10,14-tetramethyl-  
Pentadecane, 2,6,10-trimethyl-  
Pentadecanoic acid, 14-methyl-, methyl ester  
Pentadecanoic acid, glycerine-(1)-monoester, bis-O-trimethylsilyl-  
Pentadecanoic acid, TMS derivative  
Pentanamide  
Pentanoic acid, 2,4-dimethyl-3-oxo-, methyl ester  
Pentanoic acid, 2-[(trimethylsilyl)oxy]-, trimethylsilyl ester  
Pentanoic acid, 3-methyl-2-oxo-, methyl ester  
Pentanoic acid, 4-oxo-, pentyl ester  
Pentyl linoleate  
Phenanthrene, 1,2,3,4,4a,9,10,10a-octahydro-1,1,4a-trimethyl-7-(1-methylethyl)-, (4aS-trans)-  
Phenethylamine, ?-methyl-N-propyl-  
Phenol, 2,4-bis(1-methylethyl)-, acetate

---

---

Phenol, 2,6-bis(1,1-dimethylethyl)-4-methyl-, methylcarbamate  
Phenol, 4,6-di(1,1-dimethylethyl)-2-methyl-  
Phenol, TMS derivative  
phenoxyethanol, TMS derivative  
p-Hydroxydiisopropylbenzene, TMS derivative  
Pipelic acid, 2TMS derivative  
Pipelic acid, N-ethoxycarbonyl-, dodecyl ester  
Pipelic acid, N-octyloxycarbonyl-, undecyl ester  
Propanal, 2-methyl-  
Propanamide, N-(1-naphthyl)-2-methyl-  
Propanedinitrile, cyclohexyl(2-methylcyclohexyl)-  
Propanetriol, 2-methyl-, tris-O-(trimethylsilyl)-  
Propanoic acid, 2-methyl-, hexyl ester  
Propylene glycol, 2TMS derivative  
Propylparaben, TMS derivative  
Pyrogallol, 3TMS derivative  
Pyroglutamic acid, TMS derivative  
Pyrrole-2-carboxylic acid, 2TMS derivative  
Pyruvic acid, butyl ester  
Pyruvic acid, TMS derivative  
Quinoline, 1,2-dihydro-2,2,4-trimethyl-  
Resorcinol, TMS derivative  
Ribitol, 5TMS derivative  
Ribonic acid, 2,3,4,5-tetrakis-O-(trimethylsilyl)-, trimethylsilyl ester  
Salsoline  
Serine, 3TMS derivative  
s-Indacen-1(2H)-one, 3,5,6,7-tetrahydro-3,3,4,5,8-hexamethyl-  
Squalene  
Stearic acid, TMS derivative  
Sulfurous acid, isobutyl pentyl ester  
Supraene  
Synephrine, N,O,O'-tris-trimethylsilyl  
Talose, 5TMS derivative  
Tetracosanol, O-TMS  
Tetracyano-p-quinodimethane  
Tetradecane  
Tetradecanenitrile  
Tetradecanoic acid, 10,13-dimethyl-, methyl ester  
Tetradecanoic acid, 2-oxo-, ethyl ester  
Tetradecanoic acid, dimethyl(isopropyl)silyl ester  
Tetrahydrogeranyl formate  
Thiourea, tetramethyl-  
Tolycaine  
trans,trans-9,12-Octadecadienoic acid, propyl ester  
trans-13-Octadecenoic acid  
trans-9-Octadecenoic acid, pentyl ester  
Tri(1,2-propyleneglycol), monomethyl ether  
Tributyl acetylcitrate  
Tridecane  
Tridecane, 3-methylene-  
Tridecane, 4-methyl-  
Tridecanoic acid, TMS derivative  
Triethanolamine, 3TMS derivative  
Triethylene glycol, 2TMS derivative  
Trimethylolpropane, 3TMS derivative  
Trimethylsilyl tricosanoate  
Trimethylsilylserine  
Triphenylphosphine oxide

---

Tris(trimethylsilyl)carbamate  
Trisaminol, 3-OTMS  
Tromethamine, 4TMS derivative  
Undecane, 2,5-dimethyl-  
Undecane, 2,6-dimethyl-  
Undecane, 3,9-dimethyl-  
Undecane, 3-methyl-  
Undecane, 4-methyl-  
Undecane, 5-methyl-  
Undecanoic acid, 11-amino-  
Uracil, 2TMS derivative  
Urazole  
Urea, 2TMS derivative  
Valine, N-methyl-N-ethoxycarbonyl-, isohexyl ester  
Xylitol, 5TMS derivative  
Xylose, 4TMS derivative  
Z-(13,14-Epoxy)tetradec-11-en-1-ol acetate

Table S2: Molecules with different abundances between apple groups

|                                                                       | FC      | raw.pval |
|-----------------------------------------------------------------------|---------|----------|
| 1,2,3-Butanetriol, 3TMS derivative                                    | 43.391  | 0.001848 |
| 1,2-Benzenedicarboxylic acid, bis(2-ethylhexyl) ester                 | 3.1702  | 0.016918 |
| 1,2-Benzenediol, O-4-methoxybenzoyl -O'-2-furoyl-                     | 2.7326  | 0.003042 |
| 1,2-Cyclohexanedicarboxylic acid, heptadecyl 2-methylcyclohexyl ester | 2.2178  | 0.019562 |
| 1-Butoxy-2-propanol, TMS derivative                                   | 2.5963  | 0.008612 |
| 1-Chloroundecane                                                      | 3.1714  | 0.00242  |
| 1-Ethoxycarbonylmethylpyridinium bromide                              | 1.7768  | 0.000777 |
| 1H-Pyrazolo[3,4-d]pyrimidin-4-amine                                   | 0.57424 | 0.013792 |
| 1H-Quinolin-2-one, 5,8-dimethoxy-1,4-dimethyl-                        | 0.55028 | 0.033273 |
| 1-Methyl-5-mercaptotetrazole                                          | 0.50372 | 0.047957 |
| 1-Octacosanol, 2,4,6,8-tetramethyl-, all-R-                           | 0.53936 | 0.002067 |
| 1-Tetradecene                                                         | 2.3593  | 0.018466 |
| 1-Undecanol, TMS derivative                                           | 1.6669  | 0.029171 |
| 2,4,6-Tris(1,1-dimethylethyl-4-methylcyclohexa-2,5-dien-1-one         | 2.582   | 0.035173 |
| 2,4-Dichlorobenzoic acid, TMS derivative                              | 9.7553  | 4.44E-06 |
| 2,5-Cyclohexadiene-1,4-dione, 2,6-bis(1,1-dimethylethyl)-             | 0.65213 | 0.005792 |
| 2,5-Dimethoxyphenylacetone                                            | 2.9865  | 0.027463 |
| 2,6,8-Trimethyl-4-nonyl acetate                                       | 1.6622  | 0.004345 |
| 2,6-Dimethyldecane                                                    | 2.1435  | 0.026926 |
| 2,6-di-tert-Butyl-4-dimethylaminomethylphenol                         | 1.7458  | 0.009767 |
| 2-Acetoxyindane                                                       | 0.47058 | 0.014991 |
| 2-Amino-2-deoxyhexose, 5TMS derivative                                | 0.32526 | 0.006777 |
| 2-Benzothiazolamine, N-ethyl-                                         | 0.63035 | 0.01005  |
| 2-Butylamine, N-tetradecyl-                                           | 2.6107  | 1.76E-06 |
| 2-Ethoxyethanol, TMS derivative                                       | 3.2334  | 0.046455 |
| 2-Propanol, 1-2-2-methoxy-1-methylethoxy-1-methylethoxy-              | 7.2175  | 0.013011 |
| 2-Propanol, 2-methyl-                                                 | 2.1136  | 0.02089  |
| 3,4-Dimethoxymandelic acid, di-TMS                                    | 0.41598 | 0.000826 |
| 3,5-Diacetyl-4-methyl-1-phenyl-1,4-dihydropyridine                    | 0.61988 | 0.004208 |
| 3,5-Dimethoxymandelic acid, di-TMS                                    | 0.55152 | 0.04622  |
| 3,5-Dimethoxymandelic amide, di-TMS                                   | 3.0032  | 0.008269 |
| 3-Chlorobenzoic acid, TMS derivative                                  | 7.528   | 4.79E-05 |
| 3-Ethyl-2-methyl-2-heptanol                                           | 2.4836  | 0.025418 |
| 3-Ethyl-3-methylheptane                                               | 1.8323  | 0.002771 |

|                                                                                                                |         |          |
|----------------------------------------------------------------------------------------------------------------|---------|----------|
| 3H-1,2,4-Triazole-3-thione, 5-amino-1,2-dihydro-                                                               | 0.47736 | 0.016553 |
| 3-Methoxy-benzoic acid 3,4-dimethyl-phenyl ester                                                               | 2.2539  | 0.017459 |
| 3-Methyl-2-butanol, TMS derivative                                                                             | 1.6862  | 0.024834 |
| 4,4-Dimethyl-5-methylene-4,5-dihydro-3H-pyrrol-2-yl-4,4-dimethyl-5-methylene-pyrrolidin-2-ylidene-acetonitrile | 0.61988 | 0.004208 |
| 4-Chlorobenzoic acid, TMS derivative                                                                           | 7.5359  | 4.77E-05 |
| 4-Decene, 7-methyl-, E-                                                                                        | 1.7794  | 0.008838 |
| 4-Methoxybenzoic acid, 4-isopropylphenyl ester                                                                 | 1.8093  | 0.012482 |
| 5,2,1,6,3,4-2,3Butanediyl1,4diylidenedipentaleno2,1,6-cde2',1',6'-ghapentalene, hexadecahydro-                 | 0.44444 | 0.002067 |
| 5-Phenylvaleric acid, tert-butyldimethylsilyl ester                                                            | 3.347   | 0.00341  |
| 6-Methoxy-3-methylbenzofuran                                                                                   | 14.175  | 0.000413 |
| 9,12-Octadecadienoic acid Z,Z-, methyl ester                                                                   | 3.0499  | 0.000197 |
| 9E,11E-Conjugated linoleic acid, trimethylsilyl ester                                                          | 1.669   | 0.001769 |
| 9-Octadecenoic acid, E-, TMS derivative                                                                        | 1.6862  | 0.024834 |
| Alanylalanine, N,N'-dimethyl-N'-methoxycarbonyl-, hexyl ester                                                  | 0.48236 | 0.017379 |
| alpha-Farnesene                                                                                                | 4.6891  | 0.000584 |
| Anthra1,9-cdpyrazol-62H-one                                                                                    | 6.8279  | 0.020787 |
| Anthranilic acid, TMS derivative                                                                               | 5.0707  | 0.000411 |
| Benzaldehyde, 2,5-dimethoxy-                                                                                   | 0.4192  | 0.000115 |
| Benzaldehyde, 2-hydroxy-5-nitro-, 2-iodophenylhydrazone                                                        | 1.8687  | 0.003163 |
| Benzenamine, 4-6-methyl-2-benzothiazolyl-                                                                      | 3.8256  | 1.34E-08 |
| Benzene, 1,1'-1-ethenyl-1,3-propanediylbis-                                                                    | 0.54504 | 0.01181  |
| Benzene, 1-pentylheptyl-                                                                                       | 2.1272  | 0.005165 |
| Benzeneacetic acid, TMS derivative                                                                             | 5.3755  | 0.007656 |
| Benzothiazole, 2-o-aminophenyl-4-methyl-                                                                       | 2.2101  | 6.35E-05 |
| Boric acid, 3TMS derivative                                                                                    | 0.29856 | 0.00099  |
| Butanal, oxime                                                                                                 | 2.3494  | 0.007812 |
| Chrysophanol, 2TMS derivative                                                                                  | 1.7043  | 0.006695 |
| Cyclopentane, 1,1'-hexadecylidenebis-                                                                          | 0.4522  | 0.005536 |
| Cyclopropane, 1-1-hydroxy-1-heptyl-2-methylene-3-pentyl-                                                       | 0.23274 | 7.72E-05 |
| Dinaphtho1,2-b2',1'-dthiophene                                                                                 | 2.3156  | 0.018455 |
| Docosanol, TBDMS derivative                                                                                    | 1.9921  | 0.024672 |
| Dodecane, 4,6-dimethyl-                                                                                        | 1.5406  | 0.007414 |
| D-Xylopyranose, 4TMS derivative                                                                                | 1.9769  | 0.044205 |
| Eicosane                                                                                                       | 2.3172  | 0.037552 |
| Ethanimidic acid, N-trimethylsilyl-, trimethylsilyl ester                                                      | 0.38458 | 0.047868 |
| Formamide, N-methyl-                                                                                           | 2.4858  | 0.024985 |
| Glycerol monostearate, 2TMS derivative                                                                         | 5.0057  | 0.010721 |
| Glycine, N-methyl-N-ethoxycarbonyl-, nonyl ester                                                               | 0.48215 | 0.021337 |
| Heneicosane, 3-methyl-                                                                                         | 7.2758  | 0.000941 |
| Heptane, 2,2,4,6,6-pentamethyl-                                                                                | 2.1414  | 0.014204 |
| Hexadecanamide                                                                                                 | 3.1738  | 0.002398 |
| Indeno2',1'4,5thieno3,2-bthiopyran                                                                             | 3.6723  | 1.51E-05 |
| Inosose-2, 1,3,4,5,6-pentakis-O-trimethylsilyl-, myo-                                                          | 0.51892 | 0.039516 |
| Isopropylamine, N-tert-butyldimethylsilyl-                                                                     | 0.47798 | 0.01671  |
| Labda-820,14-dien-13-ol, 13S-, O-TMS                                                                           | 1.8424  | 0.006407 |
| l-Norleucine, N-ethoxycarbonyl-, decyl ester                                                                   | 0.60649 | 0.042664 |
| Methyl 3,4-dimethoxyphenylhydroxyacetate, TMS derivative                                                       | 1.9183  | 0.044643 |
| Methyl 9-cis,11-trans-octadecadienoate                                                                         | 2.2668  | 0.002531 |
| Naphthalene, 1-methyl-                                                                                         | 3.718   | 0.011475 |
| n-Nonadecanol-1                                                                                                | 1.5084  | 0.011911 |
| Nonane, 2,6-dimethyl-                                                                                          | 1.8323  | 0.002771 |
| Octadecanamide, N-2-methylpropyl-N-nitroso-                                                                    | 0.32678 | 0.005701 |
| Octane, 2,3,7-trimethyl-                                                                                       | 1.9888  | 0.000603 |
| Oleic Acid, Z-, TMS derivative                                                                                 | 1.5842  | 0.020916 |
| Oxalic acid, heptyl propyl ester                                                                               | 0.66044 | 0.016778 |
| Phenol, 2,4-bis1-methylethyl-, acetate                                                                         | 2.663   | 0.000517 |
| pm-4-Fluoroephedrine, N-trimethylsilyl-, trimethylsilyl ether                                                  | 0.53528 | 0.034911 |



|                                                                                                   |         |          |
|---------------------------------------------------------------------------------------------------|---------|----------|
| pm-p-Methoxyamphetamine, N-trimethylsilyl-                                                        | 0.61052 | 0.02702  |
| Propylene glycol, 2TMS derivative                                                                 | 3.0575  | 0.026156 |
| Propylparaben, TMS derivative                                                                     | 3.3474  | 0.010665 |
| Pyrrole-2-carboxylic acid, 2TMS derivative                                                        | 0.65725 | 0.04564  |
| R-9-S-2-Hydroxymethylpyrrolidin-1-yl-3-methyl-3,4-dihydro-2H-benzob1,4,5oxathiazepine 1,1-dioxide | 4.7391  | 0.005459 |
| R---Phenylephrine, N-trimethylsilyl-, bistrimethylsilyl ether                                     | 0.45322 | 0.011866 |
| Serine, 3TMS derivative                                                                           | 0.43595 | 0.041998 |
| Stearic acid hydrazide                                                                            | 3.1148  | 0.02159  |
| Sulfurous acid, isobutyl pentyl ester                                                             | 0.56612 | 0.008681 |
| trans-13-Octadecenoic acid                                                                        | 0.34168 | 0.043301 |
| Tridecane, 4-methyl-                                                                              | 1.6391  | 0.00429  |
| Trimethylsilylserine                                                                              | 0.43595 | 0.041998 |
